# Supplementary material
Source: PubMed Central journal article supplement (PMC3251228)
Supplement: supp_blood-2011-08-374561_Document1.pdf [file supp_blood-2011-08-374561_Document1.pdf]

**Table S1. Candidate Tc1 protein partners isolated through mass spectrometry**

| Protein                                                                                       | Accession no. In Pub Med / HUGO gene name | Mr KDa | Peptide sequences                                                                                                           | Protein Mascot score |
|-----------------------------------------------------------------------------------------------|-------------------------------------------|--------|-----------------------------------------------------------------------------------------------------------------------------|----------------------|
| T-cell leukemia/lymphoma protein 1                                                            | NP_001092195.1<br>TCL1A                   | 13     | R.REDEVVLGRPMTPQTQIGPSLLPIMWQLYPDGR.Y<br>M.AECPVLGEAVTDHPDR.L<br>K.QHAWLPLTIEIK.D                                           | 68                   |
| Heterogeneous nuclear ribonucleoprotein K (hnRNP K)                                           | NP_002131.2<br>HNRNPK                     | 51     | K.RPAEDMEEEEQAFKR.S                                                                                                         | 178                  |
| Heat shock 70 kDa protein 1 (HSP70.1)                                                         | NP_005336.3<br>HSPA1A                     | 70     | R.DAKLDKAQIHDLVLVGGSTR.I<br>K.NQVALNPQNTVFDK.R<br>R.TIPSYVAFTDTER.L                                                         | 162                  |
| Non-POU domain-containing octamer-binding protein (NonO protein)                              | NP_001138881.1<br>NONO                    | 54     | R.FACHSASLTVRNLPQYVSNELLEAFSVFGQVER.A<br>R.NLPQYVSNELLEAFSVFGQVER.A<br>R.FACHSASLTVR.N<br>K.GIVEFSGKPAAR.K<br>R.HEHQVMLMR.Q | 107                  |
| DAZ-associated protein 1 (Deleted in azoospermia-associated protein 1)                        | NP_733829.1<br>DAZ1                       | 43     | EYFKKFGVVTEVVMYDAEK.Q<br>K.FGVVTEVVMYDAEK.Q                                                                                 | 85                   |
| Peroxiredoxin-4                                                                               | NP_006397.1<br>PRDX4                      | 31     | VSVADHSLHLSK.A                                                                                                              | 80                   |
| 60S ribosomal protein L8                                                                      | NP_150644.1<br>RPL8                       | 28     | R.ASGNYATVISHNPETK.K                                                                                                        | 75                   |
| Eukaryotic initiation factor 4A-I                                                             | NP_001407.1<br>EIF4A1                     | 46     | R.KGVAINMVTEEDKR.T                                                                                                          | 72                   |
| 60S acidic ribosomal protein P2                                                               | NP_000995.1<br>RPLP2                      | 12     | K.LASVPAGGAVAVSAAPGSAAPAAGSAPAAAEEK.K                                                                                       | 71                   |
| CAD protein                                                                                   | NP_004332.2<br>CAD                        | 245    | R.VLGTVPVETIELTEDR.R<br>R.YGVRVLGTPVETIELTEDR.R                                                                             | 66                   |
| SWI/SNF-related matrix-associated actin-dependent regulator of chromatin subfamily C member 1 | NP_003065.3<br>SMARCA1                    | 123    | K.TLAGLVVQLLQFQEDAFGK.H<br>K.HVTNPAFTKLPK.C<br>R.RFDLQNSR.M<br>K.TPEIYLAYR.N                                                | 58                   |
| Spectrin alpha chain                                                                          | NP_003117.2<br>SPTA1                      | 285    | R.MQHNLEQQIQR.N<br>K.LGESQTLQQFSR.D                                                                                         | 55                   |
| Peptidyl-prolyl cis-trans isomerase A                                                         | NP_066953.1<br>FKBP2                      | 18     | R.IIPGFMCQGGDFTR.H<br>K.KITIADCGQLE.-                                                                                       | 51                   |
| Peroxiredoxin-1                                                                               | NP_859048.1<br>PRDX1                      | 22     | K.ATAVMPDQGQF.K.D<br>R.TIAQDYGVLK.A                                                                                         | 51                   |
| Serine-protein kinase ATM (Ataxia telangiectasia mutated) (A-T, mutated)                      | NP_000042.3<br>ATM                        | 355    | K.SLHLHMYLMLLK.E                                                                                                            | 43                   |
| Tropomyosin-1 alpha chain                                                                     | NP_001018005.1<br>TPM1                    | 33     | R.IQLVEEELDR.A                                                                                                              | 42                   |
| BAG family molecular chaperone regulator 4 (BAG-4)                                            | NP_004865.1<br>BAG4                       | 50     | R.AGGSHQEPPYPSYNSNYWNSTAR.S                                                                                                 | 41                   |
| Immunoglobulin superfamily member 21 precursor                                                | NP_116269.3<br>IGFS21                     | 52     | HPALSMPMQAEVTLVAPKGP.K.I<br>K.HPALSMPMQAEVTLVAPK.G                                                                          | 37                   |
